# Supplementary material for: Relative telomere length and oxidative DNA damage in hypertrophic ligamentum flavum of lumbar spinal stenosis
Source: PeerJ. 2018 Aug 9;6:e5381. doi: 10.7717/peerj.5381 (PMC6087619; doi:10.7717/peerj.5381)
Supplement: Supplemental Information 2 — Cumulative PDL and population doubling rate. [file peerj-06-5381-s004.xlsx]

## Sheet: Sheet1
Non-hypertrophic LF
Days	PDL	Growth rate (PDR)
10	2.35	0.235
20	3.25	0.1625
30	3.57	0.119
40	3.52	0.088
50	4.95	0.099
60	6	0.1
80	5.88	0.0735
100	5.99	0.0599
Hypertrophic LF
Days	PDL	Growth rate (PDR)
10	3.05	0.305
20	3.91	0.1955
30	4.57	0.1523
40	4.34	0.1085
50	4.69	0.0938
60	5.9	0.0983
80	6.12	0.0765
100	6.1	0.061
